# Supplementary material for: Characteristics of U.S. Mental Health Facilities That Offer Suicide Prevention Services
Source: Atypon-hosted journal article supplement (doi:10.1176/appi.ps.201400335), 2015-09-15
Supplement: appi.ps.201400335.ds001.pdf [file appi.ps.201400335.ds001.pdf]

**Online Supplement Figure.** Flowchart of Mental Health Facilities Selected, 2010 N-MHSS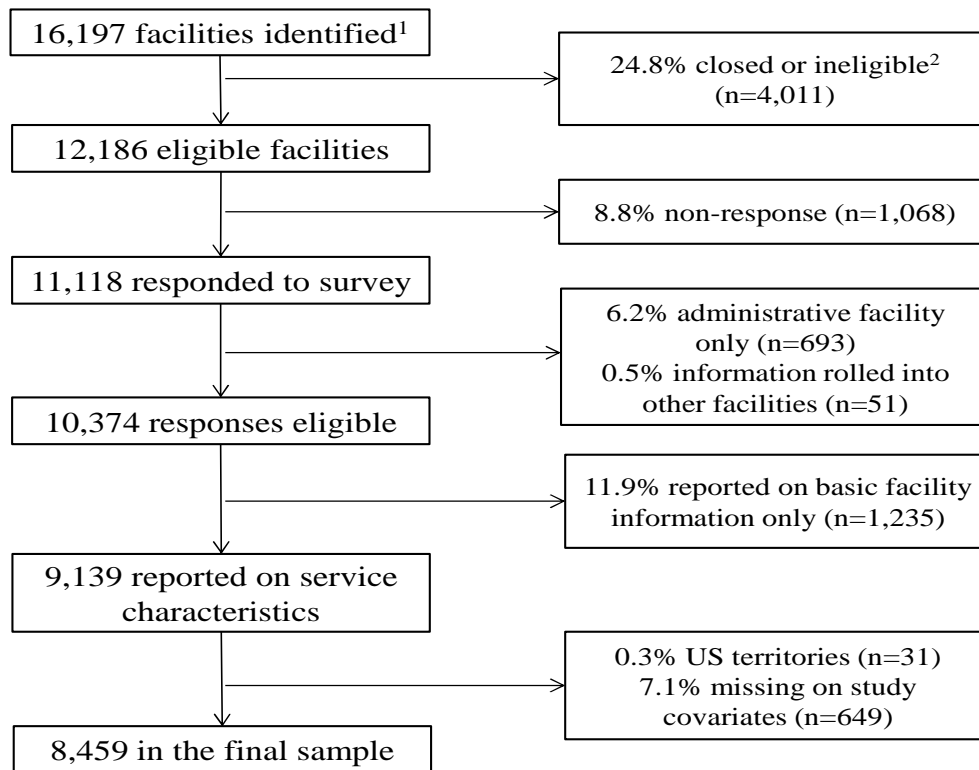

<sup>1</sup> Mental health facilities were identified from 2008 SAMHSA database and supplemented by facilities identified from professional organizations and Centers for Medicare and Medicaid Services. The survey frame did not include solo practitioners, Department of Defense military treatment facilities, tribally-operated facilities, jails, prisons, or the majority of facilities within the Veterans Health Administration (VHA) health care system.

<sup>2</sup> These facilities were not eligible for the study due to any of the following reasons: did not provide mental health treatment services, primary treatment focus was not mental health services or mix of mental health and substance abuse services, provided treatment for incarcerated persons only, or practices were individual or small group practice that were not licensed or certified as a mental health center or clinic.

### Details on Measures

During the data collection, the respondents were offered a definition packet which defined suicide prevention services as, "...include[ing] identifying risk factors; educating staff on identifying the signs of suicidal behavior and using methods to detect risk; and... assess[ing], interven[ing], and manag[ing] of suicidal patients including treatment of an underlying mental or substance abuse disorder, and us[ing] psychotropic medication, supportive services, and education. Hotlines help individuals to contact the nearest suicide prevention mental health provider." Although the follow-up after discharge was not specifically targeted at suicide prevention, this item was deemed important because of the importance of outcome follow-up after discharge as part of the suicide prevention efforts in mental health facilities (1).

1. Olfson M, Marcus SC, Bridge JA: Focusing suicide prevention on periods of high risk. JAMA 311:1107–1108, 2014 PubMed

### Online Supplement Figure

Operation of Crisis Intervention Teams across Mental Health Facilities Offering Suicide Prevention Services or Outcome Follow-up after Discharge, 2010 N-MHSS (n=8,459)<sup>1</sup>

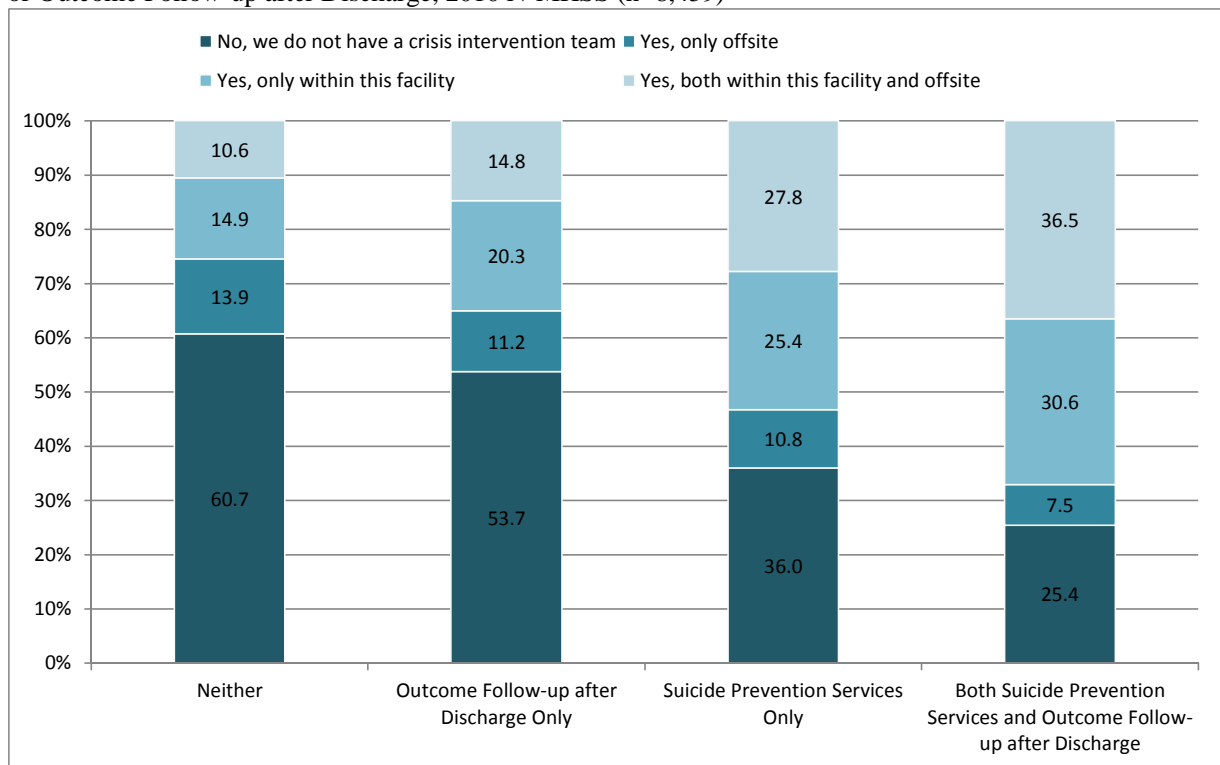

<sup>1</sup> Information unavailable for 29 mental health facilities (less than 0.01% missing)

**Online Supplement Table.** Adjusted Associations between Facility-level Characteristics and Facility Offering Suicide Prevention Services, 2010 N-MHSS n=8,459 (Adjusted Odds Ratio (AOR) (95% CI))

| Characteristics                                                                                   | Neither<br>(ref: Both) |           |       | Neither<br>(ref: Suicide Prevention<br>Services Only) |           |       | Neither<br>(ref: Follow-up Only) |           |       |
|---------------------------------------------------------------------------------------------------|------------------------|-----------|-------|-------------------------------------------------------|-----------|-------|----------------------------------|-----------|-------|
|                                                                                                   | AOR                    | 95% CI    | p     | AOR                                                   | 95% CI    | p     | AOR                              | 95% CI    | p     |
| <b>Facility type</b> (reference: Hospital-based setting <sup>1</sup> )                            |                        |           |       |                                                       |           |       |                                  |           |       |
| Outpatient, day treatment or partial hospitalization mental health facility                       | 1.67                   | 1.26-2.23 | <.001 | 2.23                                                  | 1.67-2.97 | <.001 | 1.28                             | .95-1.73  | .107  |
| Residential treatment center                                                                      | 1.21                   | .88-1.66  | .245  | 2.24                                                  | 1.62-3.10 | <.001 | .79                              | .57-1.08  | .141  |
| Multi-setting (non-hospital) MH facility                                                          | 1.56                   | .92-2.63  | .099  | 2.14                                                  | 1.23-3.72 | .007  | .72                              | .43-1.20  | .206  |
| <b>Offered mental health treatment in multiple<sup>2</sup> settings</b>                           | .86                    | .65-1.12  | .253  | 1.34                                                  | 1.01-1.77 | .039  | 1.02                             | .77-1.34  | .913  |
| <b>Primary treatment focus</b> (reference: mental health services)                                |                        |           |       |                                                       |           |       |                                  |           |       |
| Mix of mental health and substance abuse                                                          | .50                    | .42-.61   | <.001 | .77                                                   | .64-0.93  | .007  | .63                              | .52-.75   | <.001 |
| <b>Facility sponsor/operator</b> (reference: private non-profit organization)                     |                        |           |       |                                                       |           |       |                                  |           |       |
| Private-for-profit organization                                                                   | .51                    | .39-.67   | <.001 | 1.25                                                  | 0.93-1.68 | .146  | .71                              | .55-.92   | .009  |
| State mental health agency (SMHA)                                                                 | .50                    | .36-.69   | <.001 | 0.68                                                  | 0.49-0.92 | .014  | .90                              | .65-1.26  | .555  |
| Local, county or municipal government                                                             | .93                    | .71-1.22  | .595  | 0.81                                                  | 0.63-1.04 | .093  | 1.02                             | .78-1.35  | .880  |
| Other                                                                                             | .84                    | .62-1.14  | .274  | 1.24                                                  | 0.91-1.68 | .168  | 2.05                             | 1.44-2.9  | <.001 |
| <b>Age group of clients/patients accepted for treatment</b> (reference: Both youth and adults)    |                        |           |       |                                                       |           |       |                                  |           |       |
| Adults only                                                                                       | 1.90                   | 1.57-2.30 | <.001 | 1.70                                                  | 1.41-2.05 | <.001 | 1.47                             | 1.22-1.77 | <.001 |
| Youth only                                                                                        | .59                    | .46-.76   | <.001 | .92                                                   | .72-1.19  | .531  | .62                              | .50-.78   | <.001 |
| <b>Disease management and coordination related support services<sup>3</sup></b> (reference: none) |                        |           |       |                                                       |           |       |                                  |           |       |
| One                                                                                               | .28                    | .22-.36   | <.001 | .45                                                   | .36-.56   | <.001 | .67                              | .55-.82   | <.001 |
| Two                                                                                               | .15                    | .12-.20   | <.001 | .28                                                   | .22-.36   | <.001 | .59                              | .48-.74   | <.001 |
| Three or more                                                                                     | .10                    | .08-.14   | <.001 | .19                                                   | .15-.24   | <.001 | .56                              | .43-.72   | <.001 |
| <b>Housing related support services<sup>4</sup></b> (reference: none)                             |                        |           |       |                                                       |           |       |                                  |           |       |
| One                                                                                               | .75                    | .62-.92   | .006  | 1.18                                                  | .95-1.45  | .131  | 1.09                             | .89-1.34  | .393  |
| Two or three                                                                                      | .69                    | .53-.90   | .006  | .91                                                   | .69-1.19  | .483  | .93                              | .71-1.23  | .631  |
| <b>Employment related support services<sup>5</sup></b> (reference: none)                          |                        |           |       |                                                       |           |       |                                  |           |       |
| Either one                                                                                        | .70                    | .55-.89   | .003  | .70                                                   | .55-.89   | .003  | .95                              | .73-1.23  | .678  |
| Both                                                                                              | .70                    | .53-.93   | .014  | .66                                                   | .49-.88   | .005  | .92                              | .68-1.25  | .599  |
| <b>Offer psychiatric emergency walk-in services</b>                                               | .26                    | .22-.31   | <.001 | .31                                                   | .26-.37   | <.001 | .95                              | .77-1.17  | .632  |
| <b>Licensing, certification, or accreditation</b>                                                 |                        |           |       |                                                       |           |       |                                  |           |       |
| State mental health agency                                                                        | 1.13                   | .95-1.35  | .162  | .80                                                   | .67-.95   | .011  | .98                              | .83-1.16  | .824  |
| Joint Commission                                                                                  | .73                    | .60-.88   | .001  | .75                                                   | .63-.90   | .002  | 1.14                             | .95-1.37  | .163  |
| Commission on Accreditation of                                                                    | .41                    | .33-.51   | <.001 | 1.15                                                  | .90-1.46  | .253  | .32                              | .26-.39   | <.001 |

|                                                                         |      |           |       |      |           |       |      |           |       |
|-------------------------------------------------------------------------|------|-----------|-------|------|-----------|-------|------|-----------|-------|
| Rehabilitation Facilities                                               |      |           |       |      |           |       |      |           |       |
| Medicaid                                                                | .68  | .58-.80   | <.001 | .83  | .71-.98   | .023  | .95  | .81-1.10  | .473  |
| <b>Offer special programs for veterans</b>                              | .35  | .29-.43   | <.001 | .61  | .50-.75   | <.001 | .59  | .48-.72   | <.001 |
| <b>Total single-day client count</b> (reference: less than 50)          |      |           |       |      |           |       |      |           |       |
| 50-249                                                                  | 1.35 | 1.10-1.67 | .004  | 1.10 | .89-1.36  | .391  | 1.12 | .92-1.36  | .257  |
| 250 or more                                                             | 1.57 | 1.24-1.97 | <.001 | .88  | .70-1.11  | .280  | 1.60 | 1.28-2.01 | <.001 |
| <b>Region</b> (reference: Northeast)                                    |      |           |       |      |           |       |      |           |       |
| Midwest                                                                 | 1.18 | .94-1.46  | .147  | 1.24 | 1.00-1.54 | .047  | 1.06 | .87-1.29  | .587  |
| South                                                                   | 1.37 | 1.10-1.71 | .005  | 1.04 | .84-1.29  | .709  | .97  | .79-1.19  | .792  |
| West                                                                    | 1.49 | 1.18-1.87 | .001  | .89  | .72-1.10  | .279  | 1.77 | 1.41-2.22 | <.001 |
| <b>Urbanicity</b> <sup>6</sup> (reference: large metropolitan counties) |      |           |       |      |           |       |      |           |       |
| Medium metro counties                                                   | 1.08 | .89-1.33  | .431  | 1.00 | .83-1.22  | .967  | 1.21 | 1.00-1.46 | .055  |
| Small metro counties                                                    | .73  | .57-.93   | .013  | .75  | .59-.96   | .021  | .98  | .77-1.25  | .885  |
| Nonmetropolitan counties                                                | .70  | .58-.85   | <.001 | .80  | .65-.96   | .020  | .98  | .81-1.18  | .812  |

<sup>1</sup> Hospital-based setting consists of psychiatric hospital and separate inpatient psychiatric unit of a general hospital.

<sup>2</sup> Indicated facilities that offered treatment in more than one type of settings, i.e. inpatient, outpatient, or residential.

<sup>3</sup> Disease coordination included assertive community treatment, case management, chronic disease/illness management, illness management and recovery, and psychosocial rehabilitation services.

<sup>4</sup> Housing included supported housing, housing services, and therapeutic foster care.

<sup>5</sup> Employment included supported employment and vocational rehabilitation services.

<sup>6</sup> Based on the 2006 National Center for Health Statistics Urban-Rural Classification Scheme for Counties
